# Supplementary material for: Cyclization-blocked proguanil as a strategy to improve the antimalarial activity of atovaquone
Source: PubMed Central journal article supplement (PMC6499835; doi:10.1038/s42003-019-0397-3), 2019-05-03
Supplement: 42003_2019_397_MOESM2_ESM.pdf [file 42003_2019_397_MOESM2_ESM.pdf]

## Description of Additional Supplementary Files

**File Name:** Supplementary Data 1

**Description:** Tabs labelled Figure 3 and 4 and Figure 7, show 50% inhibitory concentrations (IC<sub>50</sub>) for independent experiments and mean IC<sub>50</sub> +/- SD. Tabs labelled Figure 5 and Figure 6 show mean growth inhibition for independent experiments and mean +/- SD. Tabs labelled Figure 8 and Figure 9 show calculate fractional inhibitory concentrations (FIC) of compounds which when combined result in 50% growth inhibition. Tab labelled Figure 10 shows growth as normalized to atovaquone and DMSO vehicle as determined by bioluminescence intensity of eight wells per concentration
